# Supplementary material for: Update on Fever of Unknown Origin in Children: Focus on Etiologies and Clinical Approach
Source: MDPI journal article supplement (doi:10.3390/children11010020), 2023-12-24
Supplement: s1 [file s1]

**Table S1: case series of FUO in children published over the last 50 years**

| Author (year)       | Country   | Study design                | Total cases | Infections | Inflammatory | Neoplasiae | Miscellaneous | NO diagnosis |
|---------------------|-----------|-----------------------------|-------------|------------|--------------|------------|---------------|--------------|
| Hu B (2022)         | Cina      | Single center retrospective | 1288        | 50.9%      | 4.9%         | 6.7%       | 26.6%         | 10.9%        |
| Xu J (2022)         | Cina      | Single center retrospective | 357         | 45.7%      | 37.2%        | 5.9%       | 11.2%         |              |
| Szymanski AM (2020) | USA       | Single center retrospective | 110         | 37.2%      | 14.5%        | 4.5%       | 5.4%          | 38.2%        |
| Antoon (2018)       | USA       | Single center retrospective | 102         | 41.2%      | 27.5%        | 17.7%      | 13.7%         |              |
| Chien YL (2017)     | Cina      | Single center prospective   | 93          | 37%        | 14%          | 17.2%      | 16%           | 15.1%        |
| Kim JS (2017)       | Corea     | Single center retrospective | 100         | 19%        | 15%          | 7%         | 8%            | 43%          |
| Cho LY (2017)       | Taiwan    | Single center retrospective | 126         | 27%        | 12.7         | 16.6%      | 19.8 (KD)     | 23.8%        |
| Hassan RH (2014)    | Egitto    | Single center retrospective | 127         | 36.2%      | 10.2%        | 7.9%       | 29.9%         | 15.7%        |
| Mahmoudi S (2014)   | Iran      | Single center retrospective | 95          | 26.6%      | 14.7%        | 7.4%       | 51.6%         |              |
| Tezer H (2012)      | Turchia   | Single center               | 77          | 50.7%      | 7.2%         | 14.4%      | 27.5%         | 10.3%        |
| Chow A (2011)       |           | Systematic Review           | 1638        | 51%        | 9%           | 6%         | 11%           | 23%          |
| Joshi N (2008)      | India     | Single center retrospective | 49          | 69%        | 2%           | 12%        | 4%            | 12%          |
| Pasic S (2006)      | Serbia    | Single center prospective   | 185         | 37.5%      | 19.3%        | 6.4%       | 8.1%          | 30%          |
| Chouchane S (2004)  | Tunisia   | Single center retrospective | 67          | 56.7%      | 20.9%        | 3%         | 19.4%         |              |
| Ciftçi E (2003)     | Turchia   | Single center retrospective | 102         | 44.2%      | 6.8%         | 11.7%      | 24.3%         | 12.8%        |
| Cogulu O (2003)     | Turchia   | Single center retrospective | 80          | 58.7%      | 6.2%         | 2.5%       | 20%           | 12.5%        |
| Chantada G (1994)   | Argentina | Single center retrospective | 113         | 36.3%      | 13.3%        | 9.7%       | 21.2%         | 19.5%        |
| Steele RW (1991)    | USA       | Single center retrospective | 109         | 22%        | 6%           | 2%         | 3%            | 73%          |
| Lohr JA (1977)      | USA       | Single center retrospective | 54          | 33%        | 20%          | 13%        | 15%           | 19%          |
| Pizzo PA (1975)     | USA       | Single center retrospective | 100         | 52%        | 20%          | 6%         | 10%           | 12%          |
| McClung HJ (1972)   | USA       | Single center retrospective | 99          | 29.3%      | 11.1%        | 8.1%       | 19.1%         | 32.3%        |

| Table S2: Physical examination findings and possible diagnoses of FUO |                                     |                                                                                                                                                                                                       |
|-----------------------------------------------------------------------|-------------------------------------|-------------------------------------------------------------------------------------------------------------------------------------------------------------------------------------------------------|
| SYSTEMIC                                                              | Anorexia<br>Weight/height<br>HR     | Weight loss: leukemia, lymphoma, TB, chronic illness<br>Bradycardia: typhoid fever, malaria, leptospira, central fever/ drug fever                                                                    |
| ABDOMEN                                                               | Hepatomegaly                        | Leukemia, lymphoma, granulomatous hepatitis, hemophagocytic lymphohistiocytosis, typhoid fever, viral hepatitis, salmonellosis, brucellosis, bartonellosis, Malaria, <i>Coxiella</i> , histoplasmosis |
|                                                                       | Splenomegaly                        | Leukemia, lymphoma, TB, brucellosis, EBV, CMV, psittacosis, typhoid fever, HLH, Kikuchi-Fujimoto disease                                                                                              |
|                                                                       | Palpable mass                       | Neoplasms, abdominal abscesses                                                                                                                                                                        |
| HEART                                                                 | Heart murmur                        | Infective endocarditis, atrial myxoma                                                                                                                                                                 |
|                                                                       | Arrhythmias                         | Rheumatic Fever, Lyme disease, myocardial abscesses                                                                                                                                                   |
|                                                                       | Friction rubs                       | Infectious pericarditis or pericardial effusions (SLE)                                                                                                                                                |
| LYMPH NODES                                                           | Lymphadenomegaly                    | Leukemia, lymphoma, bartonellosis, tuberculosis, lymphogranuloma venereum, CMV, EBV, adenovirus, HIV, toxoplasmosis, brucellosis, tularemia, mycobacteriosis, JIA, Kikuchi-Fujimoto disease           |
| MUSCULOSKELETAL                                                       | Bone pain                           | Osteomyelitis, neoplasms, infantile cortical hyperostosis                                                                                                                                             |
|                                                                       | Arthralgia/arthritis                | JIA, Familial Mediterranean Fever, SLE, Lyme disease, brucellosis, lymphogranuloma venereum, Hyper-IgD syndrome                                                                                       |
|                                                                       | Myalgias                            | Pyomyositis, viral myositis, brucellosis, trichinellosis, arbovirus infection, polyarteritis, subdiaphragmatic abscess                                                                                |
|                                                                       | Spinal pain                         | Discitis, spondylodiscitis, brucellosis, typhoid fever, infective endocarditis                                                                                                                        |
| GENITO-URINARY                                                        | Epididymitis                        | TB, lymphoma, brucellosis, leptospirosis, EBV, blastomycosis                                                                                                                                          |
| SKIN AND APPENDAGES                                                   | Erythema nodosum                    | Infections, JIA, SLE, IBD, neoplasm                                                                                                                                                                   |
|                                                                       | Erythema migrans                    | Lyme disease                                                                                                                                                                                          |
|                                                                       | Malar rash                          | SLE, Parvovirus                                                                                                                                                                                       |
|                                                                       | Salmon rash                         | JIA                                                                                                                                                                                                   |
|                                                                       | Palpable purpura                    | PAN, Endocarditis, bacteremia, viral infections, rickettsia, vasculitis                                                                                                                               |
|                                                                       | Seborrheic rash                     | Histiocytosis                                                                                                                                                                                         |
|                                                                       | Digital clubbing                    | Heart disease, chronic pulmonary disease, hepatitis, CF, endocarditis                                                                                                                                 |
|                                                                       | Bullous lesions                     | Staphylococcus aureus infection                                                                                                                                                                       |
| ORAL CAVITY PHARYNX                                                   | Pharyngeal hyperemia                | CMV, EBV, toxoplasmosis, tularemia, leptospirosis                                                                                                                                                     |
|                                                                       | Ulcers/aphthae                      | Behçet disease, SLE                                                                                                                                                                                   |
|                                                                       | Gingival hypertrophy                | Leukemia, Histiocytosis                                                                                                                                                                               |
|                                                                       | Epistaxis                           | Leukemia, psittacosis, rheumatic fever                                                                                                                                                                |
|                                                                       | Dental pain or pharyngeal asymmetry | Dental abscess, sinusitis<br>Parapharyngeal abscesses, Lemierre syndrome                                                                                                                              |
| FACE                                                                  | Pain, swelling                      | Mastoiditis, sinusitis                                                                                                                                                                                |
| NECK                                                                  | Meningism                           | Chronic meningitis<br>Mastoiditis, sinusitis, vertebral osteomyelitis                                                                                                                                 |
|                                                                       | Palpable mass                       | Lymphadenopathies, Lemierre syndrome, KD, suppurative thyroiditis                                                                                                                                     |
| EYE                                                                   | Ocular fundus altered               | Miliar TB, toxoplasmosis, vasculitis                                                                                                                                                                  |
|                                                                       | Conjunctival hyperemia              | EBV, leptospirosis, KD, tuberculosis, SLE, bartonellosis, Chlamydia                                                                                                                                   |
|                                                                       | Dry eye                             | Familial dysautonomy, SLE, PAN, Sjögren syndrome                                                                                                                                                      |
|                                                                       | Uveitis                             | Tuberculosis, JIA, toxoplasmosis, sarcoidosis, SLE                                                                                                                                                    |
|                                                                       | Retinal ischemia                    | PAN                                                                                                                                                                                                   |
|                                                                       | Opsoclonus/myoclonus                | Neuroblastoma                                                                                                                                                                                         |
